# Supplementary material for: Engineering of a genome-reduced strain Bacillus amyloliquefaciens for enhancing surfactin production
Source: Research Square preprint supplement (doi:10.21203/rs.3.rs-41198/v4), 2020-12-04
Supplement: Supplementary file 1 [file 00b53e7f6586cc500e51d916.docx]

**Supplementary material**

Engineering of a genome-reduced strain *Bacillus amyloliquefaciens* for enhancing surfactin production

Fang Zhang,1 Kaiyue Huo,1 Xingyi Song,1 Yufen Quan,1 Shufang Wang,1 Zhiling Zhang,2,3* Weixia Gao,4* Chao Yang1*

1Key Laboratory of Molecular Microbiology and Technology for Ministry of Education, Key Laboratory of Bioactive Materials for Ministry of Education, College of Life Sciences, Nankai University, Tianjin, China

2Department of Maxillofacial Radiology, Tianjin Stomatological Hospital, School of Medicine, Nankai University, Tianjin 300041,China

3Tianjin Key Laboratory of Oral and Maxillofacial Function Reconstruction, Tianjin 300041,China

4MOE Key Laboratory of Industrial Fermentation Microbiology, College of Biotechnology, Tianjin University of Science and Technology, Tianjin, China

*Correspondence to:

Zhiling Zhang (Tel./Fax: +86 22 59080620, E-mail: zhilingzhang@nankai.edu.cn)

Weixia Gao (Tel./Fax: +86 22 60601566, E-mail: gaoweixia@tust.edu.cn)

Chao Yang (Tel./Fax: +86 22 23503866, E-mail: yangc20119@nankai.edu.cn)

**
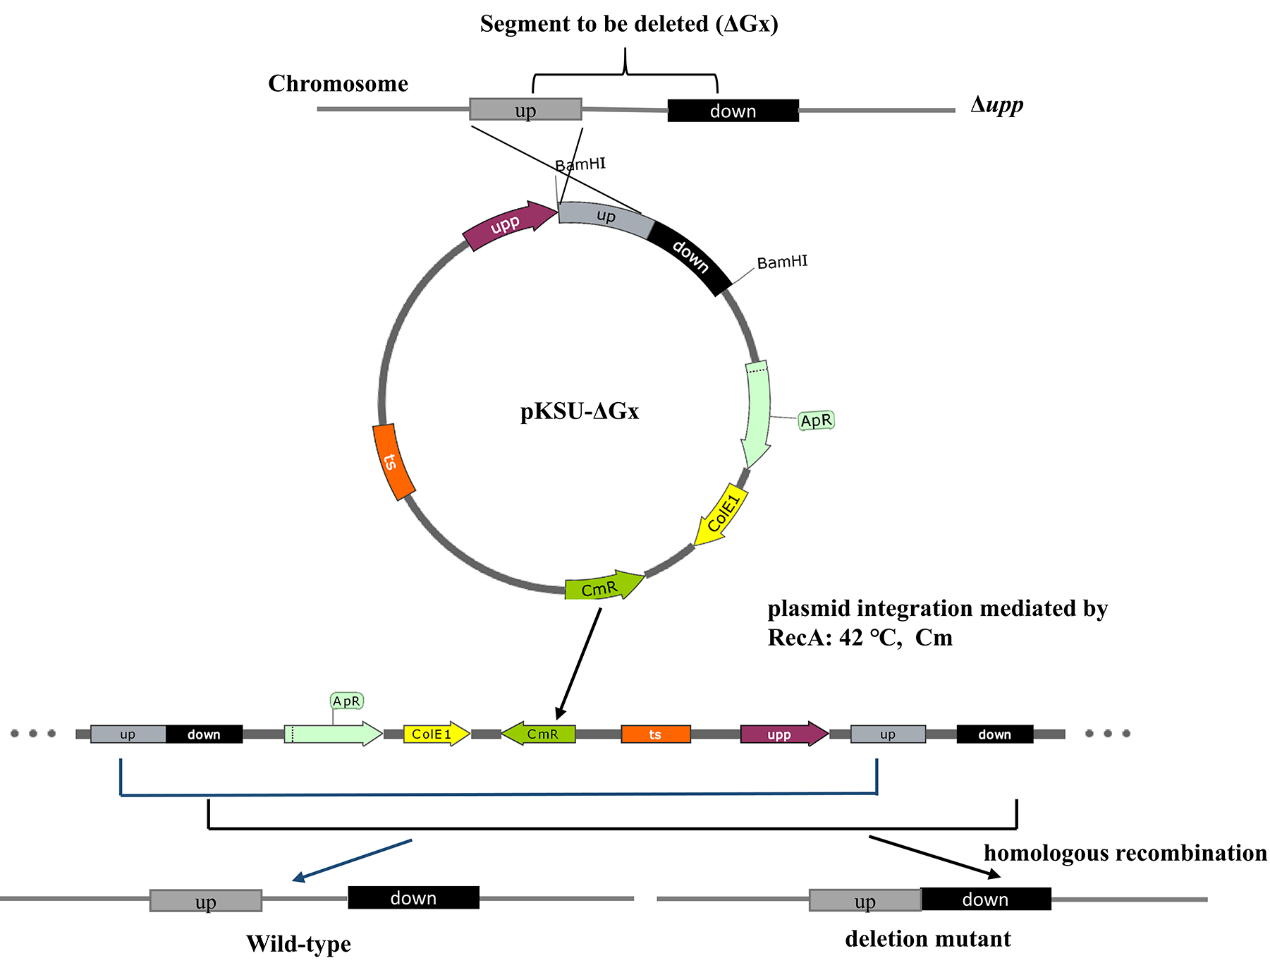
**

**Figure S1** Schematic diagram for scarless deletion of large-segments in the *B. amyloliquefaciens*. ApR, ampicillin resistance gene; CmR, chloramphenicol resistance gene.

**
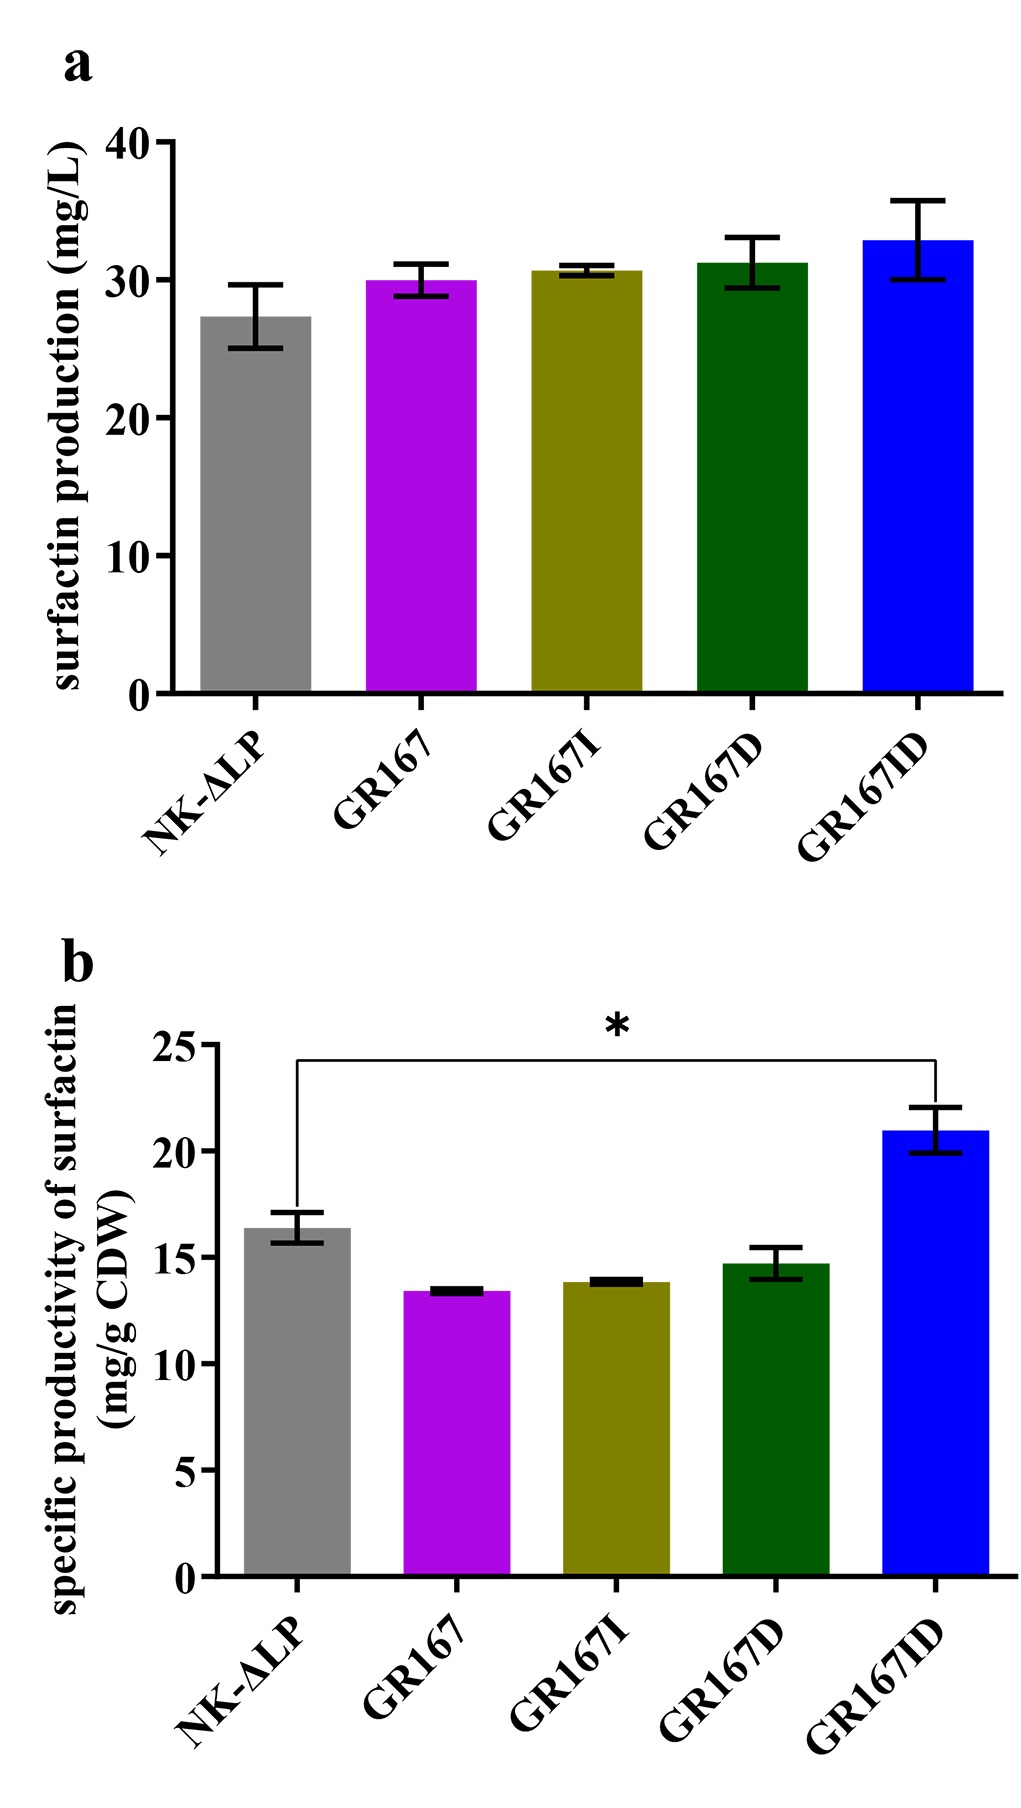
**

**Figure S2** Surfactin production by GR167 and its derivatives. **a** Surfactin production; **b** specific productivity of surfactin (mg/g CDW, the ratio of surfactant production to cell dry weight). To accumulate surfactin, the strains were incubated in Landy medium for 48 h at 30 °C and 180 rpm. NK-ΔLP was used as a control. Values denote mean ± SD of triplicates (**P* < 0.05)


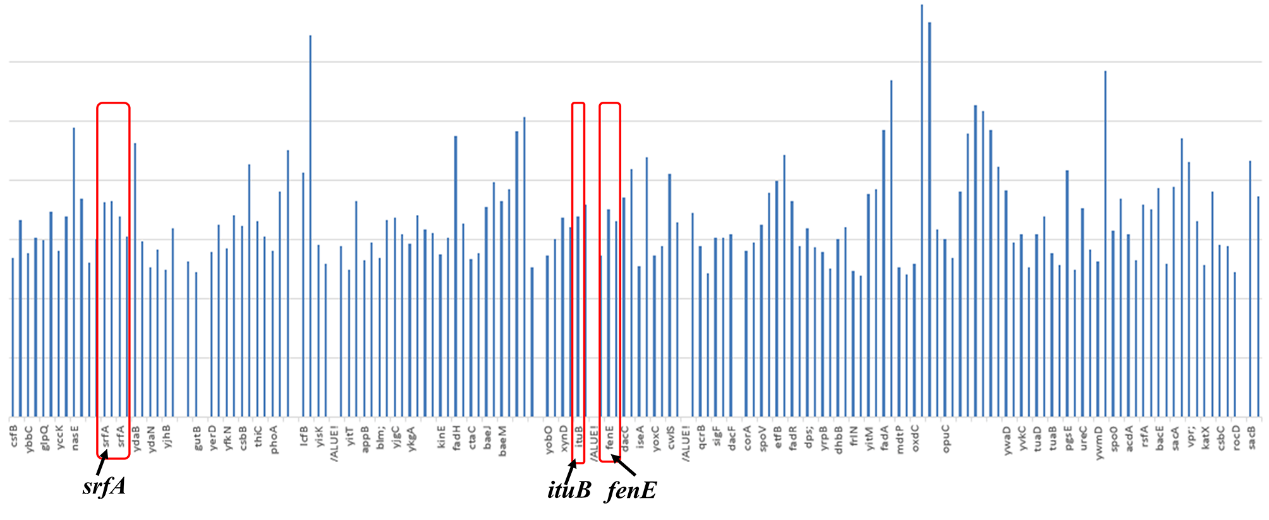


**Figure S3** The up-regulated genes in the transcriptome of NK-ΔLP compared with that of the *B. amyloliquefaciens* LL3. The *srfA*, *ituB* and *fenE* genes are responsible for the biosynthesis of surfactin, iturin and fengycin, respectively.


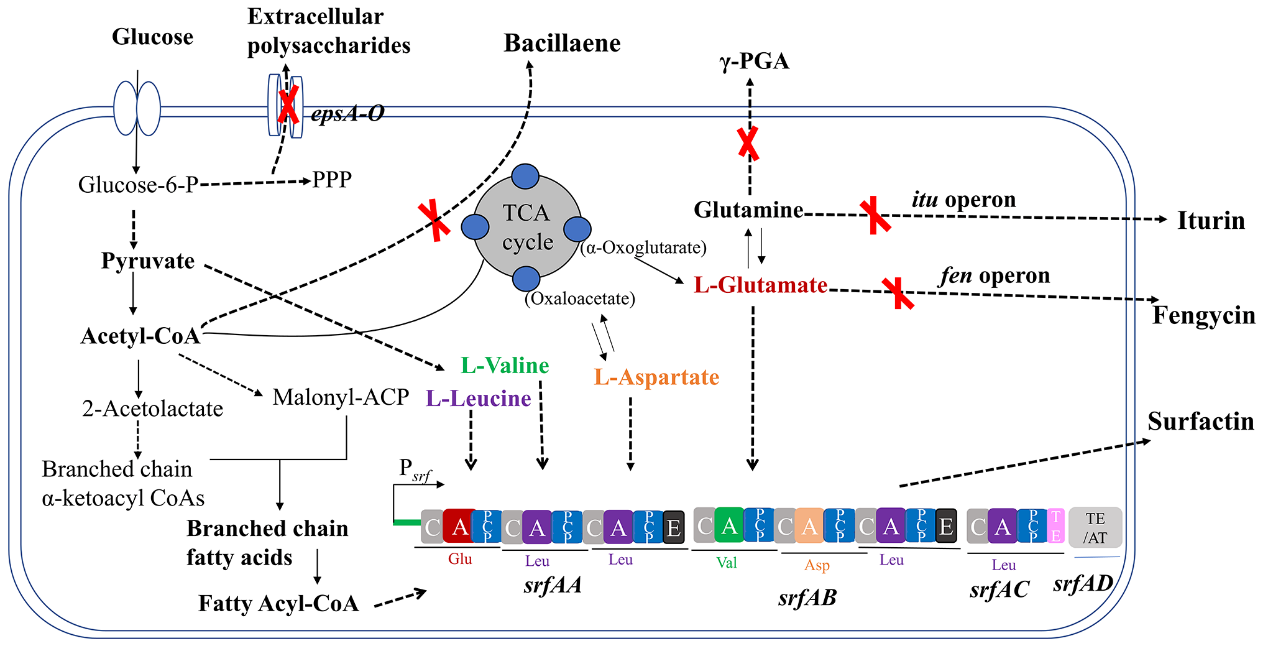


**Figure S4** Schematic of surfactin biosynthesis pathway in *Bacillus.* sp. The four amino acids (shown in red, orange, green and purple words) are assembled onto fatty acyl-CoA via NRPS encoded by *srfA* operon. The domains of adenylation domain (A), peptidyl carrier protein (PCP), and condensation (C) are used for selecting and activating substrates, carrying aminoacyl-adenylate, and forming peptide bonds, respectively. Epimerization (E) and thioesterase (TE) are responsible for the stereochemical conversion and the relase of products. Glu, Glutamate; Leu, Leucine; Val, Valin; Asp, Aspartate. The X marked in red indicate the blocked pathways during genome reduction or the optimized pathway


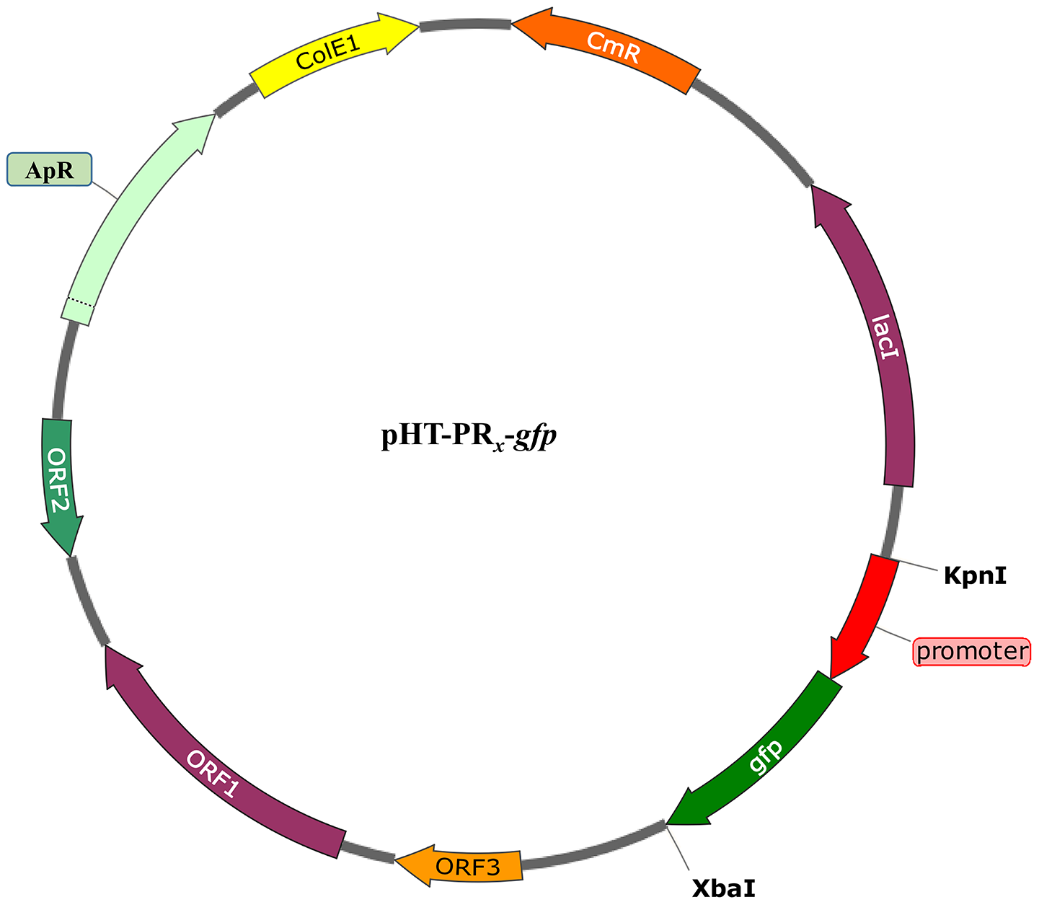


**Figure S5** Mapof recombinant vectors harboring respectively the eighteen endogenous promoters (PR*ugt*, PR*suc*, PR*ydh*, PR*accD*, PR*clp*, PR*tpxi*, PR*gltX*, PR*nad*, PR*arg*, PR*gltA*, PR*ahp*, PR*nrfA*, PR*pgmi*, PR*hom*, PR*hem*, PR*ldh*, PR*rpsU*, PR*alsD*) and *lac* promoter. *gfp*, reporter gene; ApR, ampicillin resistance gene; CmR, chloramphenicol resistance gene.

**
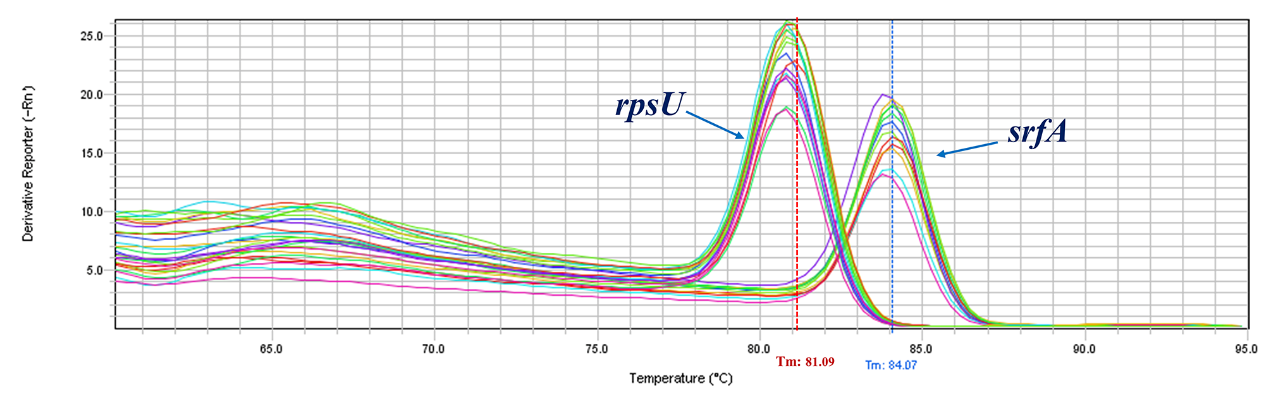
**

**Figure S6** Melting curves of *srfA* and *rpsU* gene in GR167ID, GR167IDS and GR167IDT.

**Table S1** **Regions deleted during the construction of genome-reduced strain GR167**

| **Deleted regions** | **Note** | **Position (start-end)** | **Amount of DNA removed (kb)** | **Content of G+C (%)** |
| --- | --- | --- | --- | --- |
| *upp* a | uracil phosphoribosyltransferase | 3597040-3597659 | 0.66 | / |
| G0 (pMC1) b | endogenous plasmid | / | 6.76 | / |
| G1 (*eps* cluster) | extracellular polysaccharide synthase | 3347296-3363008 | 15.71 | / |
| G2 (prophage 1) | phage-associated protein | 2247906-2271732 | 23.84 | 38 |
| G3 (partial *bae* cluster) | bacillaene synthesis | 1745467-1792824 | 47.36 | / |
| G4 (prophage 2) | phage-associated protein | 850951-891433 | 40.48 | 41 |
| G5 (prophage 3) | phage-associated protein | 2159768-2189833 | 30.07 | 36 |
| G6 (*pgsBCA* cluster) | γ-polyglutamate synthetase | 3506811-3509823 | 3.01 | / |

a *upp* deleted by Zhang *et al.* (2014)

bendogenous plasmid deleted by Feng *et al*. (2013)

**Table S2** **Gene annotation of** **streamlined genomic regions in *B. amyloliquefaciens* LL3**

| Deletion units | Gene name | Position (start-end) | Product |
| --- | --- | --- | --- |
| *upp* | *upp* | [3597040..3597759](-) | uracil phosphoribosyltransferase |
| G0 | pMC1 | / | endogenous plasmid |
| G1 | *epsO* | [3347296..3348258](-) | polysaccharide pyruvyl transferasefamily protein |
| *epsN* | [3348237..3349409](-) | aminotransferase class I/II-fold pyridoxal phosphate-dependent enzyme |
| *epsM* | [3350058..3350666](-) | sugar transferase |
| *epsL* | [3350663..3352180](-) | MATE family efflux transporter |
| *epsK* | [3352177..3353211](-) | glycosyltransferase |
| *epsI* | [3353208..3354284](-) | polysaccharide pyruvyl transferase family protein |
| *epsH* | [3354289..3355326](-) | glycosyltransferase family 2 protein |
| *epsG* | [3355345..3356448](-) | EpsG family protein |
| *epsF* | [3356452..3357588](-) | glycosyltransferase family 1 protein |
| *epsE* | [3357581..3358423](-) | glycosyltransferase family 2 protein |
| *epsD* | [3358420..3359559](-) | glycosyltransferase family 4 protein |
| *epsC* | [3359575..3361368](-) | polysaccharide biosynthesis protein |
| *epsB* | [3361615..3362295](-) | CpsD/ CapB family tyrosine-protein kinase |
| *epsA* | [3362301..3363008](-) | hypothetical protein |
| G2 | *yomK* | [2247972..2248382](+) | hypothetical protein |
| *puta* | [2248454..2249080](+) | hypothetical protein |
| unknown | [2249127..2256233](+) | phage tail family protein |
| *yomG* | [2257054..2259687](+) | hypothetical protein |
| unknown | [2259913..2260080](+) | hypothetical protein |
| *yomF* | [2260174..2260989](+) | hypothetical protein |
| *phi1* | [2261003..2263552](+) | hypothetical protein |
| *xlyA* | [2263725..>2264183](+) | N-acetylmuramoyl-L-alanine amidase |
| unknown | [<2264604..>2264828](+) | N-acetylmuramoyl-L-alanine amidase |
| unknown | [<2264829..2265107](+) | N-acetylmuramoyl-L-alanine amidase family protein |
| unknown | [2265221..2265613](+) | hypothetical protein |
| unknown | [2265634..2265885](+) | phage holin |
| unknown | [2266223..2266528](+) | hypothetical protein |
| *RapI* | [2266680..2267840](+) | etratricopeptide repeat protein |
| *uvrX* | [2268004..2268618](-) | DNA polymerase |
| unknow | [2268659..2270470](-) | maturase |
| *uvrX* | [2271022..2271729](-) | hypothetical protein |
| G3 | unknown | [1745483..1746160](+) | MBL fold metallo-hydrolase |
| *baeC* | [1746465..1747334](+) | ACP S-malonyltransferase |
| *baeD* | [1747469..1748443](+) | acyltransferase domain-containing protein |
| *baeE* | [1748445..1750682](+) | ACP S-malonyltransferase |
| *acpK* | [1750750..1750998](+) | acyl carrier protein |
| *baeG* | [1751050..1752312](+) | hydroxymethylglutaryl-CoA synthase family  protein |
| *baeH* | [1752309..1753082](+) | enoyl-CoA hydratase/isomerase |
| *baeI* | [1753092..1753841](+) | enoyl-CoA hydratase/isomerase family protein |
| *baeJ* | [1753881..1768832](+) | non-ribosomal peptide synthetase |
| *baeL* | [1768834..1782264](+) | SDR family NAD(P)-dependent oxidoreductase |
| *baeL* | [1782282..1792823](+) | SDR family NAD(P)-dependent oxidoreductase |
| G4 | *csbB* | [851154..852134](+) | glycosyltransferase family 2 protein |
| *yfhO* | [852171..854756](+) | YfhO family protein |
| *yfhP* | [854753..855736](-) | metal-dependent hydrolase |
| *xerC* | [855957..857105](-) | site-specific integrase |
| unknown | [857173..857637](-) | ImmA/IrrE family metallo-endopeptidase |
| unknown | [857652..857957](-) | helix-turn-helix transcriptional regulato |
| unknown | [858230..858430](+) | helix-turn-helix transcriptional regulator |
| unknown | [858417..858689](+) | hypothetical protein |
| unknown | [858739..858888](+) | hypothetical protein |
| *yqaH* | [858885..859166] (+) | hypothetical protein |
| unknown | [859153..85946](+) | hypothetical protein |
| *yoqD* | [859452..860099](+) | Rha family transcriptional regulator |
| unknown | [860112..860957](+) | hypothetical protein |
| unknown | [861119..861487](+) | hypothetical protein |
| *repO* | [861499..862272](+) | hypothetical protein |
| unknown | [862265..862621](+) | hypothetical protein |
| *dnaB* | [862622..863950](+) | replicative DNA helicase |
| unknown | [863940..864152](+) | hypothetical protein |
| unknown | [864149..864349](+) | hypothetical protein |
| unknown | [864448..864906](+) | ArpU family transcriptional regulator |
| unknown | [865239..865451](+) | cell division protein FtsK |
| unknown | [865789..866403](+) | hypothetical protein |
| unknown | [866416..866616](+) | hypothetical protein |
| unknown | [866648..866962](+) | HNH endonuclease |
| unknown | [867191..867646](+) | phage terminase small subunit P27 family |
| *gp02* | [867636..869426](+) | terminase large subunit |
| *gp03* | [869438..870658](+) | phage portal protein |
| *ATP-* | [870633..871355](+) | Clp protease ClpP |
| *gp36* | [871352..872557](+) | phage major capsid protein |
| unknown | [872571..872885](+) | phage head-tail connector protein |
| *phag* | [872892..873221](+) | phage head closure protein |
| *gp10* | [873218..873646](+) | HK97 gp10 family phage protein |
| unknown | [873643..874032](+) | hypothetical protein |
| majo | [874091..874666](+) | tail protein |
| unknown | [874742..875062](+) | hypothetical protein |
| *yqbO* | [875245..881001](+) | phage tail tape measure protein |
| *gp17* | [881004..881843](+) | phage tail family protein |
| *gp18* | [881853..883007](+) | phage tail protein |
| phag | [883000..88330](+) | hypothetical protein |
| unknown | [883500..884315](+) | SGNH/GDSL hydrolase family protein |
| *gp24* | [884331..885617](+) | BppU family phage baseplate upper protein |
| unknown | [885618..885953](+) | DUF2977 domain-containing protein |
| unknown | [885960..886205](+) | hypothetical protein |
| *bhlA* | [886240..886455](+) | hypothetical protein |
| *xhlB* | [886467..886733](+) | phage holin |
| unknown | [886789..887946](+) | N-acetylmuramoyl-L-alanine amidas |
| unknown | [887992..888939](-) | hypothetical protein |
| unknown | [889003..889557](-) | hypothetical protein |
| *ORF5* | [889847..890945](+) | tetratricopeptide repeat protein |
| G5 | unknown | [2159722..2159940](-) | hypothetical protein |
| *yopY* | [2160070..2160327](-) | hypothetical protein |
| *yosE* | [2160636..2160983](-) | hypothetical protein |
| *yosD* | [2160998..2161405](-) | hypothetical protein |
| unknown | [2162058..2162264](-) | hypothetical protein |
| unknown | [2162559..2162822](-) | hypothetical protein |
| *yorV* | [2163593..2163811](-) | hypothetical protein |
| *mtbP* | [2163862..2165355](-) | DNA (cytosine-5-)-methyltransferase |
| unknown | [2165422..2166258](-) | site-specific DNA-methyltransferase |
| unknown | [2166383..2166730](-) | hypothetical protein |
| *yorS* | [2166792..2167310](-) | 5'-3'-deoxyribonucleotidase |
| *yorR* | [2167288..2167815](-) | AAA family ATPase |
| *yorP* | [2167975..2168178](-) | YorP family protein |
| *yabE* | [2168190..2168897](-) | hypothetical protein |
| *yorL* | [2168924..2172853](-) | DNA polymerase III subunit alpha |
| *yorK* | [2172866..2174596](-) | single-stranded-DNA-specific exonuclease RecJ |
| *yorK* | [2174596..2175732](-) | hypothetical protein |
| *yorI* | [2175748..2177262](-) | hypothetical protein |
| *yorH* | [2177277..2177747](-) | hypothetical protein |
| *yorG* | [2177788..2178759](-) | ATP-binding protein |
| *yorF* | [2178849..2179763] | hypothetical protein |
| unknown | [2179786..2180166](-) | hypothetical protein |
| unknown | [2180305..2180688](-) | hypothetical protein |
| *yorC* | [2180880..2181257](-) | hypothetical protein |
| *yorA* | [2181296..2183038](-) | right-handed parallel beta-helix repeat-containing protein |
| *yoqZ* | [2183035..2183856](-) | hypothetical protein |
| unknown | [2184254..2184526](-) | hypothetical protein |
| unknown | [2184516..2185403](-) | hypothetical protein |
| unknown | [2185452..2185931](-) | hypothetical protein |
| *yopY* | [2185947..2186198](-) | hypothetical protein |
| *yoqX* | [2186224..2186469](-) | hypothetical protein |
| *yoqW* | [2186540..2187214](+) | SOS response-associated peptidase |
| *ligB* | [2187284..2188096](+) | ATP-dependent DNA ligase |
| unknown | [2188314..2188511](+) | hypothetical protein |
| unknown | [2188810..2189031](+) | hypothetical protein |
| unknown | [2189426..2189788](-) | hypothetical protein |
| G6 | *pgsE* | [3506842..3507003](-) | hypothetical protein |
| *pgsA* | [3507011..3508159](-) | CapA family protein |
| *capC* | [3508178..3508627](-) | poly-gamma-glutamate biosynthesis protein PgsC |
| *ywsC* | [3508642..3509823](-) | poly-gamma-glutamate synthase PgsB |

**Table S3 Endogenous promoters selected according to FPKM values**

| **weak promoter** | | **moderate promoter** | | **strong promoter** | |
| --- | --- | --- | --- | --- | --- |
| promotera | FPKMb | promoter | FPKM | promoter | FPKM |
| PR*ugt* | 691 | PR*gltX* | 1268 | PR*pgmi* | 4143 |
| PR*suc* | 701 | PR*nad* | 1333 | PR*hom* | 4737 |
| PR*ydh* | 810 | PR*arg* | 1480 | PR*hem* | 7060 |
| PR*accD* | 890 | PR*gltA* | 1592 | PR*ldh* | 7569 |
| PR*clp* | 1024 | PR*ahp* | 2079 | PR*rpsU* | 16570 |
| PR*tpxi* | 1243 | PR*nrfA* | 2890 | PR*alsD* | 28940 |

a The promoters were named according to the corresponding genes; for example, PR*ugt* represents the original promoter and RBS (ribosome binding site) of *ugt* gene.

b FPKM value represents the transcriptional activity of a specific promoter.

**Table S4** **Plasmids used in this study**

| **Plasmids** | **Relative characteristics** | **source** |
| --- | --- | --- |
| pKSU | pKSV7 derivative with *upp* gene, temperature-sensitive replication origin, Apr (gram-negative) and Cmr (gram-positive) | [24] |
| pKSU-ΔG1 | pKSU derivative, carrying deletion fragment of G1 | This work |
| pKSU-ΔG2 | pKSU derivative, carrying deletion fragment of G2 | This work |
| pKSU-ΔG3 | pKSU derivative, carrying deletion fragment of G3 | This work |
| pKSU-ΔG4 | pKSU derivative, carrying deletion fragment of G4 | This work |
| pKSU-ΔG5 | pKSU derivative, carrying deletion fragment of G5 | This work |
| pKSU-ΔG6 | pKSU derivative, carrying deletion fragment of G6 | This work |
| pKSU-Δ*itu* | pKSU derivative, carrying deletion fragment of *itu* | This work |
| pKSU-Δ*fenD* | pKSU derivative, carrying deletion fragment of *fenD* | This work |
| pHT01 | *E. coli*-*Bacillus* shuttle vector, Apr (gram-negative) and Cmr (gram-positive) | This lab |
| pHT-P43-*gfp* | pHT01 derivative, used for providing *gfp* gene | This lab |
| pBBR1MCS-2 | expression plasmid used for providing *lac* promoter | This lab |
| pHT-PR*lac*-*gfp* | pHT01 derivative, containing PR*lac* promoter and *gfp* gene | This work |
| pHT-PR*ugt*-*gfp* | pHT01 derivative, containing PR*ugt* promoter and *gfp* gene | This work |
| pHT-PR*suc*-*gfp* | pHT01 derivative, containing PR*suc* promoter and *gfp* gene | This work |
| pHT-PR*ydh*-*gfp* | pHT01 derivative, containing PR*ydh* promoter and *gfp* gene | This work |
| pHT-PR*accD*-*gfp* | pHT01 derivative, containing PR*accD* promoter and *gfp* gene | This work |
| pHT-PR*clp*-*gfp* | pHT01 derivative, containing PR*clp* promoter and *gfp* gene | This work |
| pHT-PR*tpxi*-*gfp* | pHT01 derivative, containing PR*tpxi* promoter and *gfp* gene | This work |
| pHT-PR*gltX*-*gfp* | pHT01 derivative, containing PR*gltX* promoter and *gfp* gene | This work |
| pHT-PR*nad*-*gfp* | pHT01 derivative, containing PR*nad* promoter and *gfp* gene | This work |
| pHT-PR*arg*-*gfp* | pHT01 derivative, containing PR*arg* promoter and *gfp* gene | This work |
| pHT-PR*gltA*-*gfp* | pHT01 derivative, containing PR*gltA* promoter and *gfp* gene | This work |
| pHT-PR*ahp*-*gfp* | pHT01 derivative, containing PR*ahp* promoter and *gfp* gene | This work |
| pHT-PR*nrfA*-*gfp* | pHT01 derivative, containing PR*nrfA* promoter and *gfp* gene | This work |
| pHT-PR*pgmi*-*gfp* | pHT01 derivative, containing PR*pgmi* promoter and *gfp* gene | This work |
| pHT-PR*hom*-*gfp* | pHT01 derivative, containing PR*hom* promoter and *gfp* gene | This work |
| pHT-PR*hem*-*gfp* | pHT01 derivative, containing PR*hem* promoter and *gfp* gene | This work |
| pHT-PR*ldh*-*gfp* | pHT01 derivative, containing PR*ldh* promoter and *gfp* gene | This work |
| pHT-PR*rpsU*-*gfp* | pHT01 derivative, containing PR*rpsU* promoter and *gfp* gene | This work |
| pHT-PR*alsD*-*gfp* | pHT01 derivative, containing PR*alsD* promoter and *gfp* gene | This work |
| pKSU-PR*suc* | pKSU derivative, containing PR*suc* flanked by upstream and downstream regions of *srf* | This work |
| pKSU-PR*tpxi* | pKSU derivative, containing PR*tpxi* flanked by upstream and downstream regions of *srf* | This work |

Cmr, chloramphenicol resistance; Apr, ampicillin resistance

**Table S5** **Primers used in this study**

| **Primer** | **Sequence (5’ to 3’)** |
| --- | --- |
| For construction of genome reduction | |
| G1-UF | CAAAATAAGTCGACTCTAGA**GGATCC**CCGTTCTAAAAATGATCTGAC |
| G1-UR | CCTTCCGCTCATTCAGTAATATACAGCCTCATCCT |
| G1-DF | GAGGCTGTATATTACTGAATGAGCGGAAGGTTTAT |
| G1-DR | TACGAATTCGAGCTC**GGTACC**TCATGTCTATGGCCTGCTGT |
| G2-UF | CAAAATAAGTCGACTCTAGA**GGATCC**TCGACGGAAATTGGCTGAACTGG |
| G2-UR | GGAAAGTTCCCGATGCCCATCCGGTTTAAATTCCTCTCC |
| G2-DF | CCCGAGCTCTTGGTCATACCCTTTACTGCAT |
| G2-DR | TACGAATTCGAGCTC**GGTACC**GCTTCAGTATCGGCTGTAACAATGGG |
| G3-UF | CAAAATAAGTCGACTCTAGA**GGATCC**GACCGTGCCAGAAATTCTGCGATAG |
| G3-UR | TGTCGTCTCTTCACCCGAAAGAGTGTCCCGGATATAC |
| G3-DF | CGGGACACTCTTTCGGGTGAAGAGACGACAGGCATGTACC |
| G3-DR | TACGAATTCGAGCTC**GGTACC**CATCATGGCGATGATCTCCTGATCC |
| G4-UF | CAAAATAAGTCGACTCTAGA**GGATCC**GGATCTCAATAAAGTCTGTCCCGGGTAAAG |
| G4-UR | CTGCTGCAGAAGTCCAGATCCACTTCGACGGCTTTG |
| G4-DF | CTGCTGCAGAAGTCCGGACTTCTGCAGCAGGATCAGAG |
| G4-DR | TACGAATTCGAGCTC**GGTACC**GAAACCCTATTATATCAGTGTTCCG |
| G5-UF | CAAAATAAGTCGACTCTAGA**GGATCC**GATCGTTCATCCTTCCCGGTTCCTCGAA |
| G5-UR | ATATGGAGGAAAGTCGAACGAAGCAGATAAGCCGAAGGTG |
| G5-DF | TTATCTGCTTCGTTCGACTTTCCTCCATATCACCTATGGC |
| G5-DR | TACGAATTCGAGCTC**GGTACC**GACATTTGTGAAGGGCACGCAT |
| G6-UF | CAAAATAAGTCGACTCTAGA**GGATCC**AAAAAATATGCCGGCAAGCGGAAGC |
| G6-UR | GCCGCAGAGCGGAATAGCTAAACGGAATGCGCCGGGTG |
| G6-DF | GCATTCCGTTTAGCTATTCCGCTCTGCGGCTTTTTCTTT |
| G6-DR | TACGAATTCGAGCTC**GGTACC**GGTTACTCATTATAGCCTGTGCTG |
| For genetic modification of GR167 | |
| *itu-*UF | TTTGGAACAAAATAA**GGATCC**AAATTGAGGCAATAGGAATAG |
| *itu*-UR | TAACAGTCAGTGTGTTGGGATCGTTTGCGGGAGAC |
| *itu*-DF | GCAAACGATCCCAACACACTGACTGTTAAAATAGC |
| *itu*-DR | CTTGCATGCCTGCAG**GTCGAC**TGGGGGCTTCACAATGATTTATGT |
| *itu*-JF | GCGATTGATGGTGCCCATGAC |
| *itu*-JR | AAGTTCCGCGTCATGATTCC |
| *fenD*-UF | TTTGGAACAAAATAA**GGATCC**CTATCTTGCCCTCTGTCTTC |
| *fenD-*UR | AGAAATATCCTTACGCAAACGGCAAAGTGGACC |
| *fenD*-DF | TTTGCCGTTTGCGTAAGGATATTTCTGGTGCCG |
| *fenD*-DR | CTTGCATGCCTGCAG**GTCGAC**TTGAAGAATACTGTTTATGCTT |
| *fenD*-JF | AATGGGTCAGCCGGTAGCTGGCAAG |
| *fenD*-JR | TGCGTCAAATTCAGGGGAAACATCG |
| *srf*-UF | CAAAATAAGTCGACTCTAGA**GGATCC**CGCACAAAATTCTTGTGAATCAGC |
| *srf*-UR | TCCCTTTTTAGATCTAAGATAAAATTGTCAATTCTTCCTTAGAAACAG |
| *srf-*DF | TTTTATCTTAGATCTAAAAAGGGAGGCGTACACATATGGG |
| *srf*-DR | CTTGCATGCCTGCAG**GTCGAC**GAACCGCTTCGACTGCACATATTCC |
| *suc-*F | TGACAATTTTATCTTAAGAGCAGACTCGGTTAAGAAG |
| *suc-*R | TACGCCTCCCTTTTTTTCCCATCCTCCTAACTTATGT |
| *tpxi-*F | TGACAATTTTATCTTGAGAAAAGTTAACTGCCGCCC |
| *tpxi-*R | TACGCCTCCCTTTTTTCTGATTCCTCCCTTATCTATGT |
| Promoter-JF | GGATTTCGGCGGTGTTTTGAATCGG |
| Promoter-JR | GCGGATAGAATTTCTCTGTATACC |
| *srf*-p-JF | AGGAATTGACGCTTGCCGTGATAGG |
| *srf*-p-JR | GAATCCGGCCGTACAGGTCATGAGG |
| For construction of endogenous promoter library | |
| *gfp*-F | CACCGGAATTAGCTT**GGTACC**ATGAGTAAAGGAGAAGAACT |
| *gfp*-R | GACGTCGAC**TCTAGA**TTTGTATAGTTCATCCATGC |
| PR*lac*-*gfp-*F | CACCGGAATTAGCTT**GGTACC**TTTACACTTTATGCTTCCGG |
| PR*lac*-*gfp*-R | TTCTCCTTTACTCATCAACATACGAGCCGGAAGCA |
| PR*ugt*-*gfp-*F | CACCGGAATTAGCTT**GGTACC**TTTTTGTTTTGAGTGATACGGT |
| PR*ugt*-*gfp*-R | TTCTCCTTTACTCATGTAAATTCACCTCAATGTAA |
| PR*suc*-*gfp-*F | CACCGGAATTAGCTT**GGTACC**AAGAGCAGACTCGGTTAAGAAG |
| PR*suc*-*gfp*-R | TTCTCCTTTACTCATTTCCCATCCTCCTAACTTATGT |
| PR*ydh*-*gfp-*F | CACCGGAATTAGCTT**GGTACC**ACTCTCTGTATAAAAGCCAT |
| PR*ydh*-*gfp*-R | TTCTCCTTTACTCATAATCTTCTCCTCCATTTAGA |
| PR*accD*-*gfp-*F | CACCGGAATTAGCTT**GGTACC**TAACACAAAAATGAAATGGCAGCGCG |
| PR*accD*-*gfp*-R | TTCTCCTTTACTCATATGATTACCTCCCTTTTGTGAAGG |
| PR*clp*-*gfp-*F | CACCGGAATTAGCTT**GGTACC**TCAGGTGCGGTGCTGACG |
| PR*clp*-*gfp*-R | TTCTCCTTTACTCATAATGCTCCTCCTTCACC |
| PR*tpxi*-*gfp-*F | CACCGGAATTAGCTT**GGTACC**GAGAAAAGTTAACTGCCG |
| PR*tpxi*-*gfp*-R | TTCTCCTTTACTCATTCTGATTCCTCCCTTATC |
| PR*gltX*-*gfp-*F | CACCGGAATTAGCTT**GGTACC**AATCGGACAAGGATTTGATGTG |
| PR*gltX*-*gfp*-R | TTCTCCTTTACTCATGTTCAAATACTTCCTTTCATCTCGTC |
| PR*nad*-*gfp-*F | CACCGGAATTAGCTT**GGTACC**ACAGGCCGTCTCCTATCCGTTTC |
| PR*nad*-*gfp*-R | TTCTCCTTTACTCATACATCACCCTCCTGTTTTATTTACACC |
| PR*arg*-*gfp-*F | CACCGGAATTAGCTT**GGTACC**ACGTATAAAAAGGCTCTGCTCCGC |
| PR*arg*-*gfp*-R | TTCTCCTTTACTCATGTTAAAAGCTCCCTTTG |
| PR*gltA*-*gfp-*F | CACCGGAATTAGCTT**GGTACC**TGCGTCCACACCCATCTATC |
| PR*gltA*-*gfp*-R | TTCTCCTTTACTCATAATTCCTCTCCCCCGATCAG |
| PR*ahp*-*gfp-*F | CACCGGAATTAGCTT**GGTACC**GACCATACCCCCTTTGGTTTATAC |
| PR*ahp*-*gfp*-R | TTCTCCTTTACTCATAATATCTTCCTCCTGAAATGTG |
| PR*nrfA*-*gfp-*F | CACCGGAATTAGCTT**GGTACC**TGTCAGACGGCTCGTTTTTCG |
| PR*nrfA*-*gfp*-R | TTCTCCTTTACTCATATAAAAGCCTCCTTCTCTATATATCATATCCG |
| PR*pgmi*-*gfp-*F | CACCGGAATTAGCTT**GGTACC**GACTCAAACGTTCCTTCCTATTC |
| PR*pgmi*-*gfp*-R | TTCTCCTTTACTCATAAGCGTTTTACGACAAAATCCCG |
| PR*hom*-*gfp-*F | CACCGGAATTAGCTT**GGTACC**AGAAACTCCACCTTTCTCCCTTTTG |
| PR*hom*-*gfp*-R | TTCTCCTTTACTCATGAAGATATGACGTAAAAATATTTGG |
| PR*hem*-*gfp-*F | CACCGGAATTAGCTT**GGTACC**CCTGTCACCTACCCGCAGTAAAG |
| PR*hem*-*gfp*-R | TTCTCCTTTACTCATAGCCGTTCATGCACCCCCGTACATC |
| PR*ldh*-*gfp-*F | CACCGGAATTAGCTT**GGTACC**GATTCATTATTCTCCTTTCGTAC |
| PR*ldh*-*gfp*-R | TTCTCCTTTACTCATGTATGCTCATCCTCCAGTGTTTC |
| PR*rpsU*-*gfp-*F | CACCGGAATTAGCTT**GGTACC**ACGAAACACCCCTTTCCGTCAT |
| PR*rpsU*-*gfp*-R | TTCTCCTTTACTCATTCTCTTTCCCTCCCTCCGAATAC |
| PR*alsD*-*gfp-*F | CACCGGAATTAGCTT**GGTACC**CCTTATCCATTCCTTTCCCTTTG |
| PR*alsD*-*gfp*-R | TTCTCCTTTACTCATCACCCTCACTCCTTATTATGCATAT |
| For RT-qPCR | |
| Q*gfp*-F | TGCACTACTGGAAAACTACC |
| Q*gfp*-R | ACTCGATGCGATTAACAAGG |
| Q*rpsU*-F | GTCGTTAGAAAAAACGAATCGCTTG |
| Q*rpsU*-R | TTGCGTTTTCTAGCAGCTTCTGACT |
| Q*srf*-F | TTTCAAACCTTGCCGGCTTC |
| Q*srf*-R | ACAATCGCAGCCGGATTAAG |

The restriction sites are indicated in bold.

**Sequence of the promoters of PR*suc* and PR*tpxi***

**PR*suc*:**

AAGAGCAGACTCGGTTAAGAAGAGCTGTCGCCCTGCATTACGACCGGCAGAAAGATCAAGCCCCGAAGGTTATCGCAACAGGCAGGGGGCATGTGGCGGAAAATATCATAAAAGAAGCTGAGAAGGCGGGGGTCCCGATTCAGGAAGACAGGACCCTTGTCGAATTAATGCGGCATTTGACGGTCGACGATCAGATACCGGAAGCGCTTTATGAAACCGTCGCTGAAATTTTTTCATTTGTTTACCGGCTGGATGAAAGCCTGAAAAACGAAAAATAAGGATCAATCATTTCCCAGACTCCGTTTAAATTTATATTTTCAATAAAATAAAAGTTAGAATGTTTGGAAGGATATAAAGATTTTGTTTTGAACCCTAGACAATTCTTCCAGTATTATATAGAATGAAAGCGC

AGTCTATTTTTAGTTTTGCTACATAAGTTAGGAGGATGGGAA

| **Start** | **End** | **Score** | **Predicted promoter sequences** |
| --- | --- | --- | --- |
| 298 | 343 | 0.98 | CTCCGTTTAAATTTATATTTTCAATAAAATAAAAGTTAGAATGTTTGGAA |
| 328 | 373 | 0.87 | AAAAGTTAGAATGTTTGGAAGGATATAAAGATTTTGTTTTGAACCCTAGA |
| 361 | 406 | 0.99 | TTGTTTTGAACCCTAGACAATTCTTCCAGTATTATATAGAATGAAAGCGC |

**PR*tpxi*:**

GAGAAAAGTTAACTGCCGCCCGCAGTTAGCTTTTTTTACGATGCGGCATAACCTTTGCAGTTTGCCTGAAACTCGACTATGATAGAGCTATACATAGATAAGGGAGGAATCAGA

| **Start** | **End** | **Score** | **Predicted promoter sequences** |
| --- | --- | --- | --- |
| 49 | 94 | 0.95 | TAACCTTTGCAGTTTGCCTGAAACTCGACTATGATAGAGCTATACATAGA |
| 60 | 105 | 0.94 | GTTTGCCTGAAACTCGACTATGATAGAGCTATACATAGATAAGGGAGGAA |
